# Supplementary material
Source: PubMed Central journal article supplement (PMC8149487)

## ePNa - Rural Pneumonia Decision Support survey

### Data Exports, Reports, and Stats

#### All data (all records and fields)

#### Do you consent to participate in this survey? *(consent)*

| Total Count (N) | Missing  | Unique |
|-----------------|----------|--------|
| 31              | 0 (0.0%) | 1      |

Counts/frequency: **Yes** (31, 100.0%), **No** (0, 0.0%)

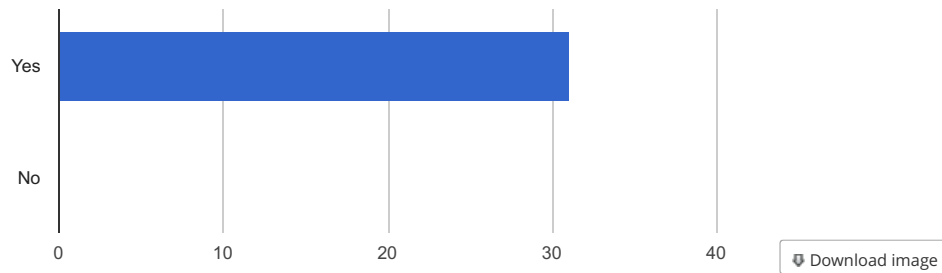

#### 1. What is your role in the ED? *(role)*

| Total Count (N) | Missing  | Unique |
|-----------------|----------|--------|
| 31              | 0 (0.0%) | 3      |

Counts/frequency: **Physician** (27, 87.1%), **PA** (3, 9.7%), **NP** (1, 3.2%)

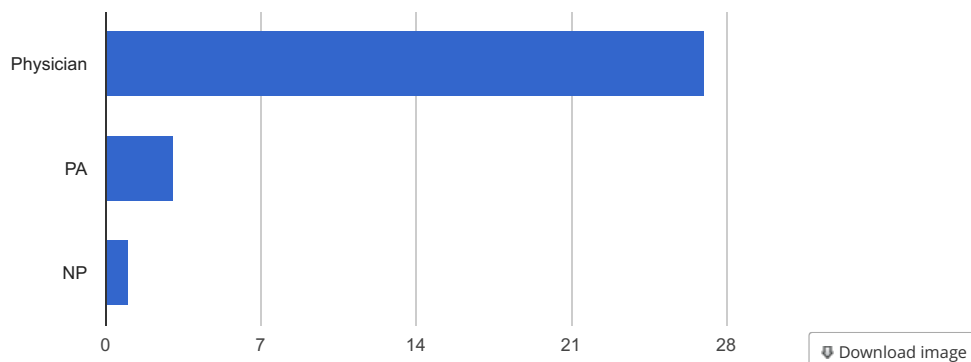

#### 2. How many years have you worked in the ED? (Consider all employment in the ED and urgent care throughout your career.) *(years\_worked)*

| Total Count (N) | Missing  | Unique | Min  | Max   | Mean  | StDev | Sum    | Percentile |      |      |             |       |       |       |
|-----------------|----------|--------|------|-------|-------|-------|--------|------------|------|------|-------------|-------|-------|-------|
|                 |          |        |      |       |       |       |        | 0.05       | 0.10 | 0.25 | 0.50 Median | 0.75  | 0.90  | 0.95  |
| 31              | 0 (0.0%) | 20     | 1.00 | 35.00 | 12.39 | 8.48  | 384.00 | 2.50       | 4.00 | 6.00 | 10.00       | 17.50 | 25.00 | 27.00 |

Lowest values: 1, 2, 3, 4, 5

Highest values: 22, 25, 27, 27, 35

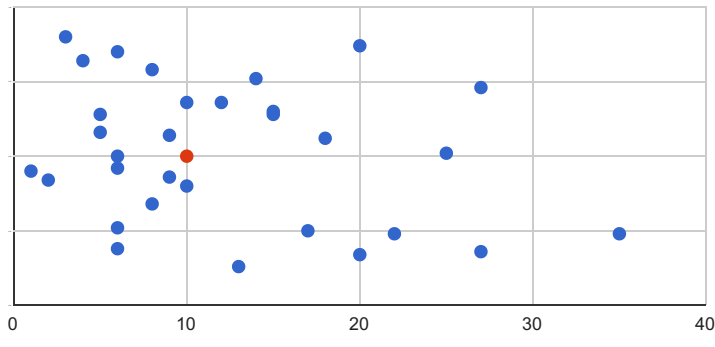

Download image

**3. What percent of the time are you both the ED and admitting clinician? (Use the slider to the right to enter your value)** (*how\_often*)

| Total Count (N) | Missing  | Unique | Min  | Max    | Mean  | StDev | Sum    | Percentile |      |      |             |       |       |       |
|-----------------|----------|--------|------|--------|-------|-------|--------|------------|------|------|-------------|-------|-------|-------|
|                 |          |        |      |        |       |       |        | 0.05       | 0.10 | 0.25 | 0.50 Median | 0.75  | 0.90  | 0.95  |
| 31              | 0 (0.0%) | 15     | 0.00 | 100.00 | 24.00 | 30.59 | 744.00 | 0.00       | 0.00 | 0.50 | 6.00        | 50.00 | 75.00 | 75.00 |

Lowest values: 0, 0, 0, 0, 0

Highest values: 64, 75, 75, 75, 100

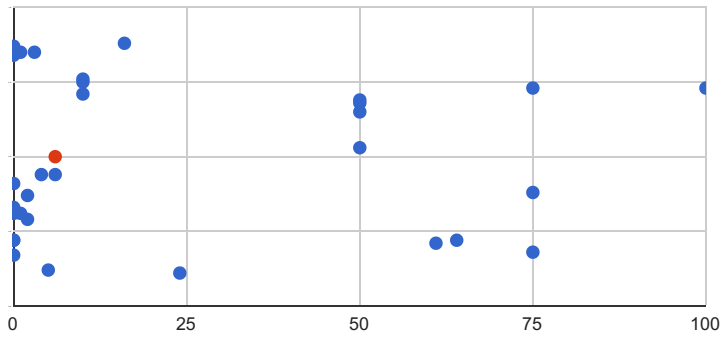

Download image

**4. What is your gender?** (*gender*)

| Total Count (N) | Missing  | Unique |
|-----------------|----------|--------|
| 31              | 0 (0.0%) | 3      |

Counts/frequency: Female (2, 6.5%), Male (27, 87.1%), Prefer not to answer (2, 6.5%)

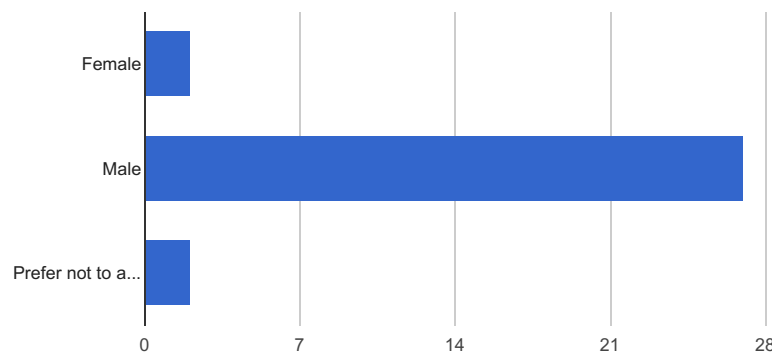

Download image

**5. What is your age?** (*age*)

| Total Count (N) | Missing  | Unique |
|-----------------|----------|--------|
| 31              | 0 (0.0%) | 4      |

Counts/frequency: 20-30 (0, 0.0%), 31-40 (14, 45.2%), 41-50 (7, 22.6%), 51-60 (8, 25.8%), 61-70 (2, 6.5%), 71-80 (0, 0.0%), 81-90 (0, 0.0%)

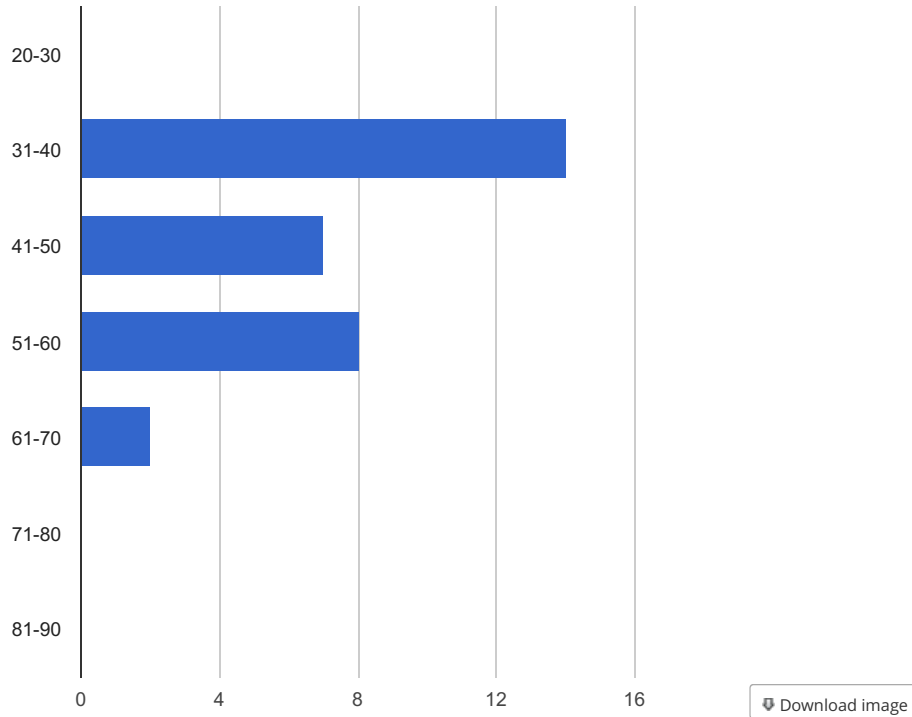

**6. In which ED do you work the majority of your shifts?** *(ed\_worked)*

| Total Count (N) | Missing  | Unique |
|-----------------|----------|--------|
| 31              | 0 (0.0%) | 9      |

Counts/frequency: Bear River (9, 29.0%), Cassia (1, 3.2%), Cedar City (1, 3.2%), Delta (5, 16.1%), Fillmore (1, 3.2%), Garfield (1, 3.2%), Sanpete (1, 3.2%), Sevier Valley (6, 19.4%), Heber Valley (0, 0.0%), Park City (6, 19.4%)

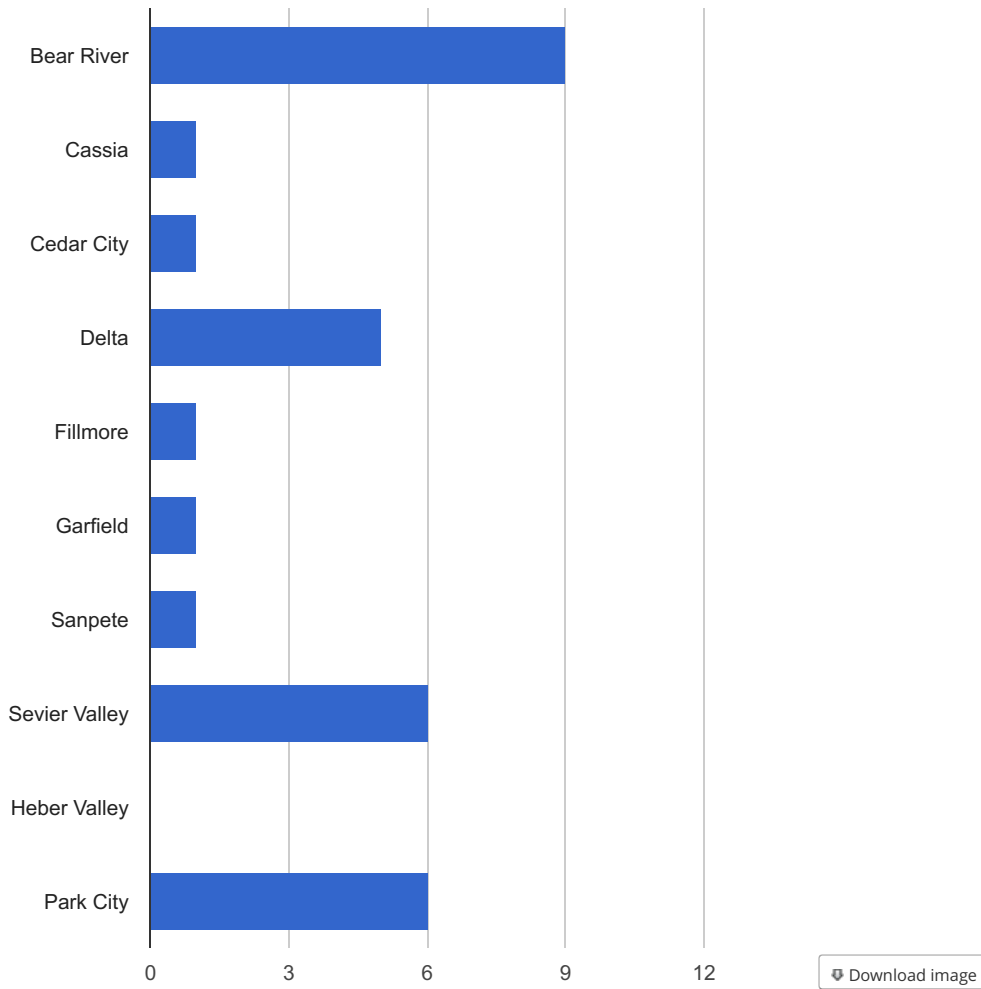

**7. Do you work in any other EDs?** *(other\_ed)*

| Total Count (N) | Missing  | Unique |
|-----------------|----------|--------|
| 31              | 0 (0.0%) | 2      |

Counts/frequency: Yes (14, 45.2%), No (17, 54.8%)

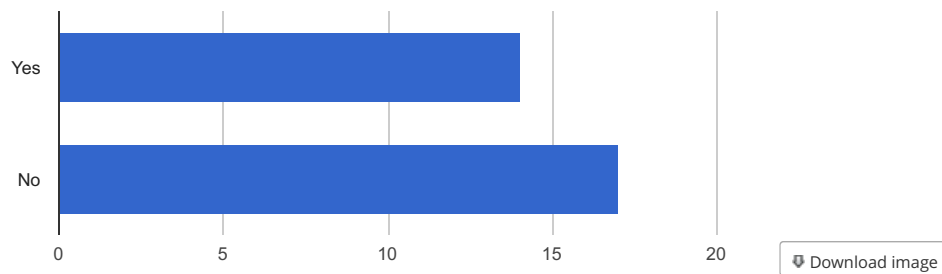

**7B. What other ED(s) do you work in?** *(other\_eds)*

| Total Count (N) | Missing    |
|-----------------|------------|
| 14              | 17 (54.8%) |

**8. Do you work somewhere else besides the ED? (e.g., inpatient, clinic)** *(where\_else)*

| Total Count (N) | Missing  | Unique |
|-----------------|----------|--------|
| 31              | 0 (0.0%) | 2      |

Counts/frequency: Yes (15, 48.4%), No (16, 51.6%)

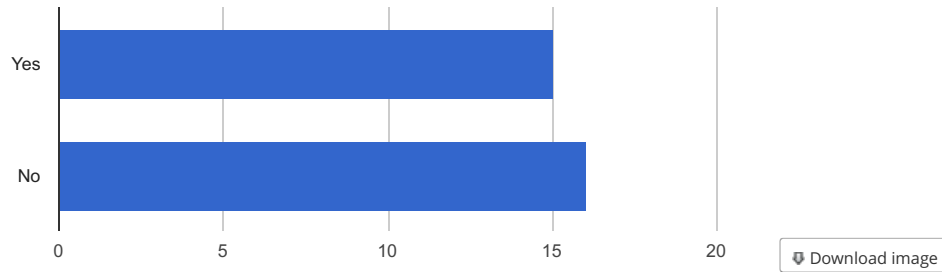

**8B. Where else do you work?** *(where\_else\_work)*

| Total Count (N) | Missing    |
|-----------------|------------|
| 15              | 16 (51.6%) |

**9. In your ED, how many minutes does it take, on average, to receive a radiologist report on chest imaging?** *(how\_long)*

| Total Count (N) | Missing  | Unique | Min   | Max   | Mean  | StDev | Sum    | Percentile |       |       |             |       |       |       |
|-----------------|----------|--------|-------|-------|-------|-------|--------|------------|-------|-------|-------------|-------|-------|-------|
|                 |          |        |       |       |       |       |        | 0.05       | 0.10  | 0.25  | 0.50 Median | 0.75  | 0.90  | 0.95  |
| 31              | 0 (0.0%) | 7      | 15.00 | 45.00 | 25.32 | 9.57  | 785.00 | 15.00      | 15.00 | 17.50 | 20.00       | 30.00 | 40.00 | 45.00 |

Lowest values: 15, 15, 15, 15, 15

Highest values: 35, 40, 45, 45, 45

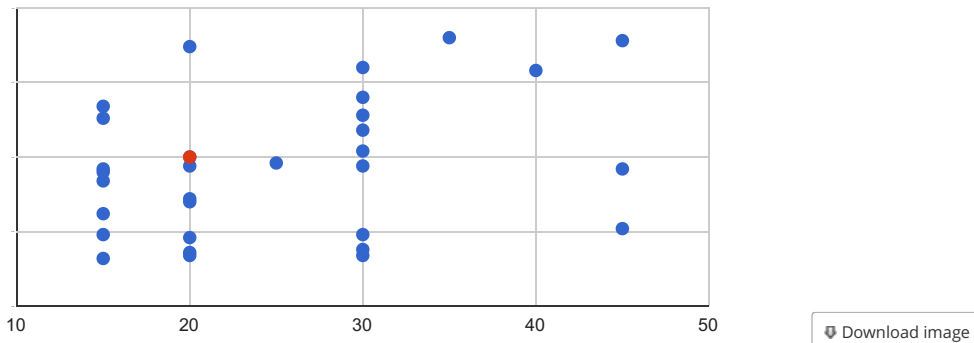

**10. If technically possible in iCentra, would you prefer a single pneumonia order set for both ED and hospital admission?** *(prefer)*

| Total Count (N) | Missing  | Unique |
|-----------------|----------|--------|
| 31              | 0 (0.0%) | 2      |

Counts/frequency: Yes (18, 58.1%), No (13, 41.9%)

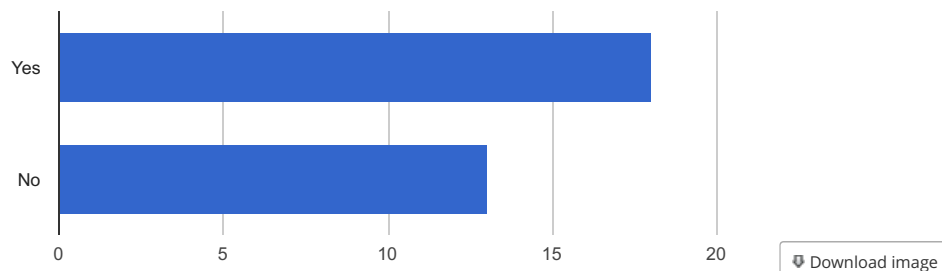

**11. Have you managed patients using ePNa?** *(use\_it)*

| Total Count (N) | Missing  | Unique |
|-----------------|----------|--------|
| 31              | 0 (0.0%) | 2      |

Counts/frequency: Yes (24, 77.4%), No (7, 22.6%)

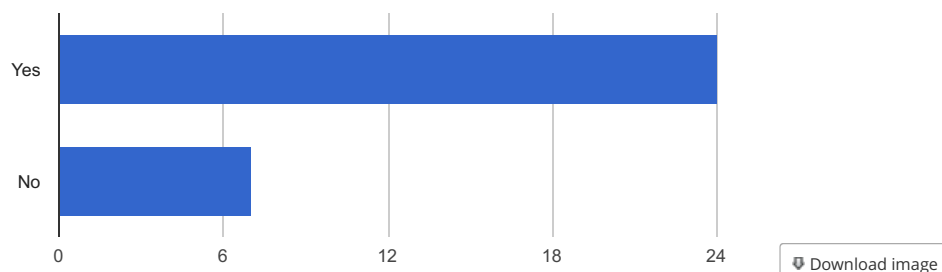

**11B. Please tell us why you have never used ePNa.** *(never\_used)*

| Total Count (N) | Missing    |
|-----------------|------------|
| 7               | 24 (77.4%) |

**12. Approximately how many patients have you managed with ePNa?** *(number\_managed)*

| Total Count (N) | Missing   | Unique |
|-----------------|-----------|--------|
| 24              | 7 (22.6%) | 5      |

Counts/frequency: 1-5 (7, 29.2%), 6-10 (3, 12.5%), 11-15 (6, 25.0%), 16-20 (2, 8.3%), more than 20 (6, 25.0%)

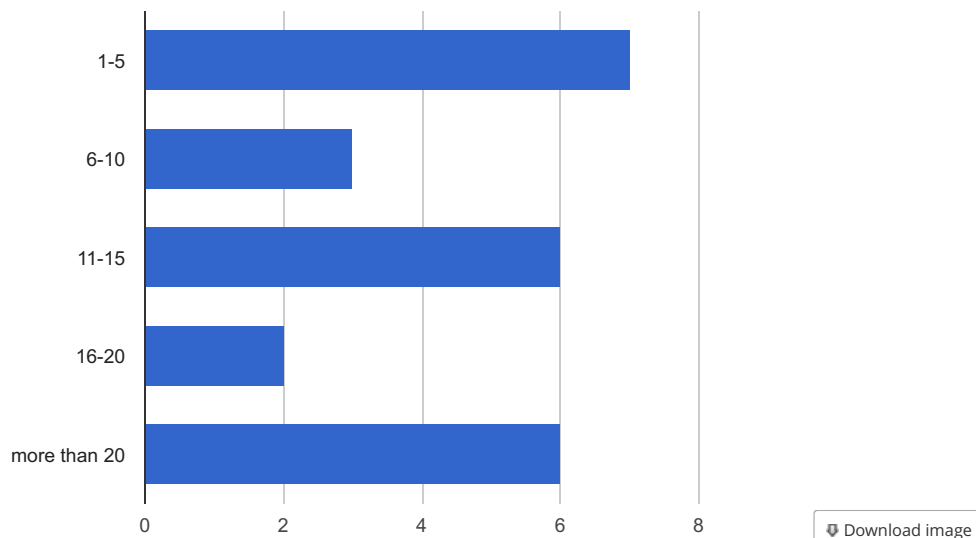

**13. What is your overall experience level with using ePNa?** *(experience)*

| Total Count (N) | Missing   | Unique |
|-----------------|-----------|--------|
| 24              | 7 (22.6%) | 4      |

**Counts/frequency:** Beginner (have to carefully read options). (9, 37.5%), Intermediate (don't recall all options but know where to find things). (9, 37.5%), Veteran (can seamlessly use tool and can confirm and document assessment). (5, 20.8%), Expert (use tool to ensure adherence to clinical decision rules and can easily recognize over-calls and missed chances). (1, 4.2%)

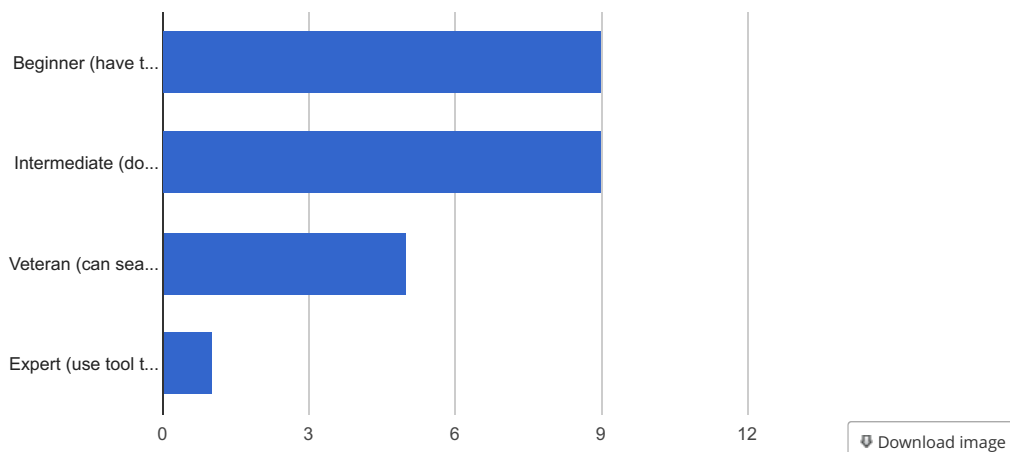

**14. Which factor most often alerts you to a patient with a possible pneumonia?**

*(how\_alerted)*

| Total Count (N) | Missing   | Unique |
|-----------------|-----------|--------|
| 24              | 7 (22.6%) | 3      |

**Counts/frequency:** Triage statement (0, 0.0%), My own clinical assessment (18, 75.0%), Chest x-ray (5, 20.8%), ePNa prompt (Launchpoint) (1, 4.2%), RN (0, 0.0%), HUC or other staff (0, 0.0%), Student (0, 0.0%), Other (0, 0.0%)

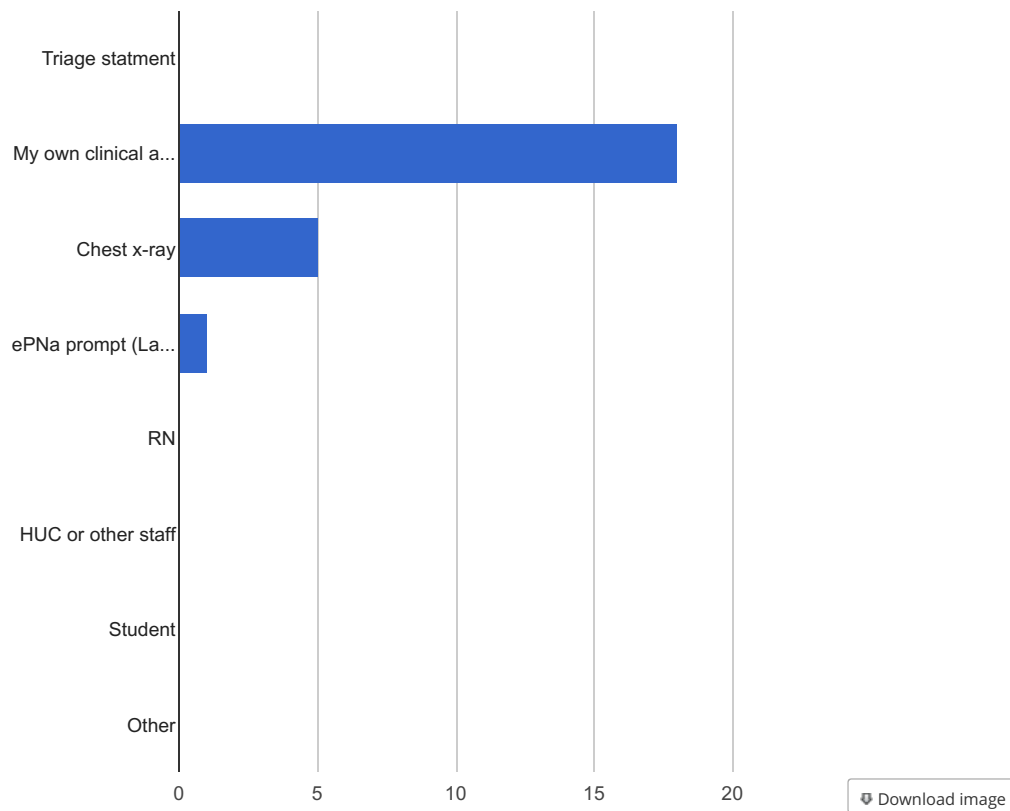

**14B. What "other" factor most often alerts you to a patient with possible pneumonia?**

(*other\_alert*)

| Total Count (N) | Missing     |
|-----------------|-------------|
| 0               | 31 (100.0%) |

**15. I notice the green "P" alert in Launchpoint when one of my patients might have pneumonia**

(*notice\_alert*)

| Total Count (N) | Missing   | Unique |
|-----------------|-----------|--------|
| 24              | 7 (22.6%) | 5      |

**Counts/frequency:** Strongly Disagree (1, 4.2%), Disagree (7, 29.2%), Neither Agree nor Disagree (5, 20.8%), Agree (10, 41.7%), Strongly Agree (1, 4.2%)



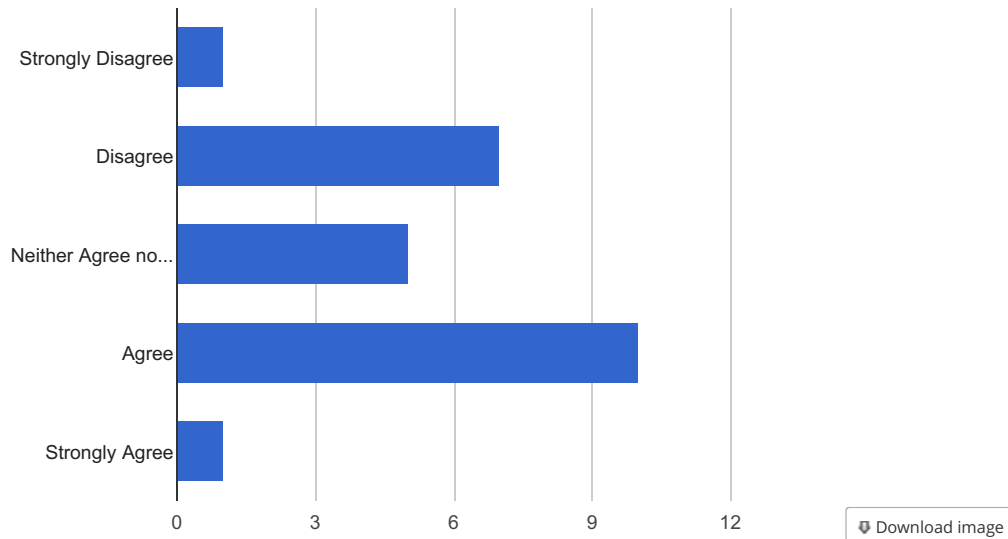

**16. ePNa helps me be more confident when diagnosing pneumonia** (*diag\_confidence*)

| Total Count (N) | Missing   | Unique |
|-----------------|-----------|--------|
| 24              | 7 (22.6%) | 5      |

**Counts/frequency:** Strongly Disagree (3, 12.5%), Disagree (7, 29.2%), Neither Agree nor Disagree (8, 33.3%), Agree (3, 12.5%), Strongly Agree (3, 12.5%)

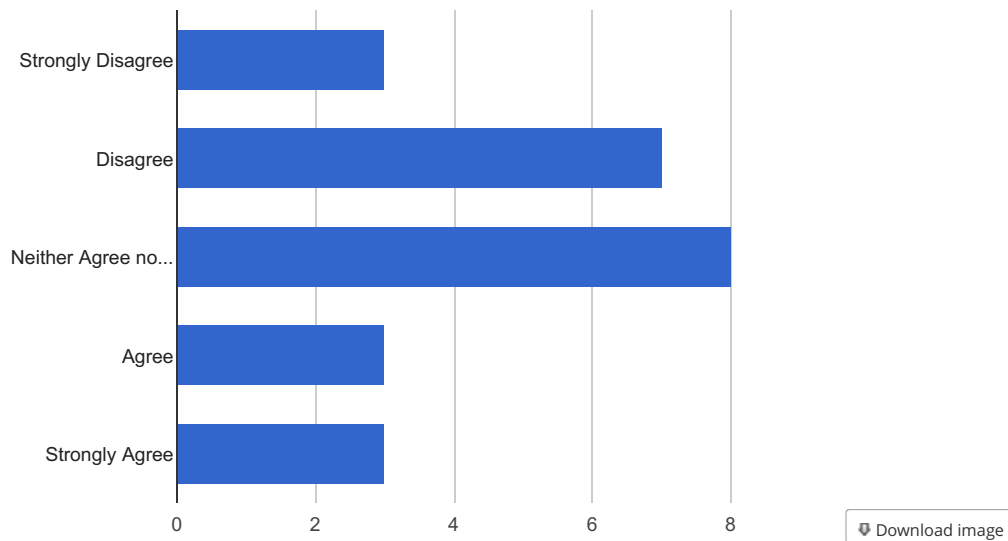

**17. It takes too much time to use ePNa** (*too\_long*)

| Total Count (N) | Missing   | Unique |
|-----------------|-----------|--------|
| 24              | 7 (22.6%) | 5      |

**Counts/frequency:** Strongly Disagree (2, 8.3%), Disagree (8, 33.3%), Neither Agree nor Disagree (8, 33.3%), Agree (4, 16.7%), Strongly Agree (2, 8.3%)

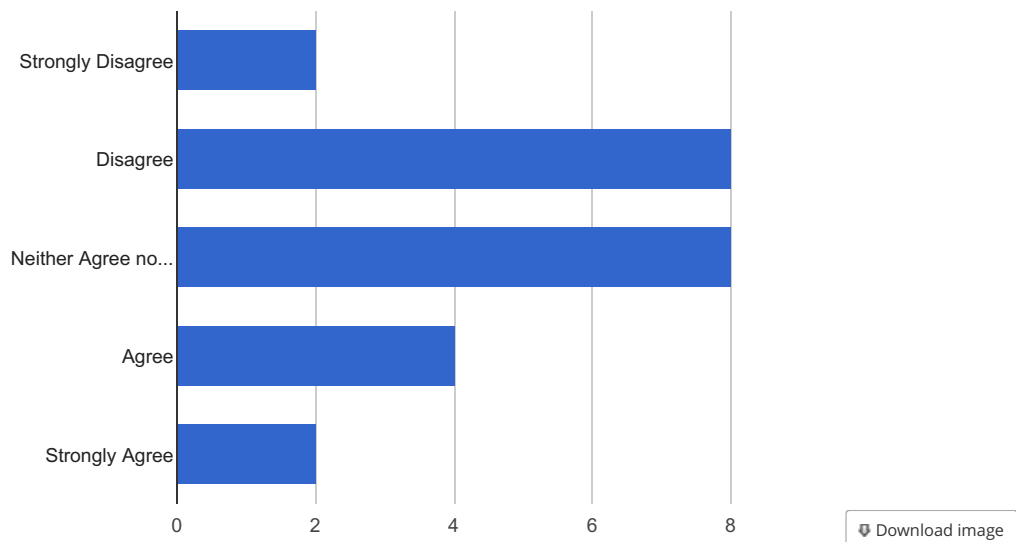

**18. ePNa helps me determine when outpatient management is appropriate** (*opt\_care*)

| Total Count (N) | Missing   | Unique |
|-----------------|-----------|--------|
| 24              | 7 (22.6%) | 5      |

**Counts/frequency:** Strongly Disagree (1, 4.2%), Disagree (4, 16.7%), Neither Agree nor Disagree (8, 33.3%), Agree (8, 33.3%), Strongly Agree (3, 12.5%)

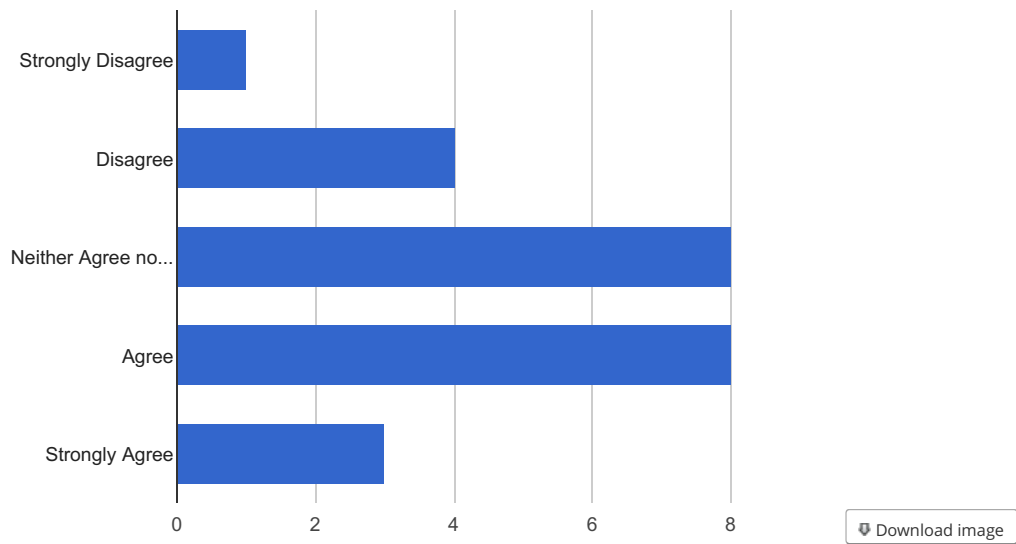

**19. ePNa helps me provide the best care for my patients with pneumonia** (*best\_care*)

| Total Count (N) | Missing   | Unique |
|-----------------|-----------|--------|
| 24              | 7 (22.6%) | 5      |

**Counts/frequency:** Strongly Disagree (2, 8.3%), Disagree (2, 8.3%), Neither Agree nor Disagree (8, 33.3%), Agree (7, 29.2%), Strongly Agree (5, 20.8%)

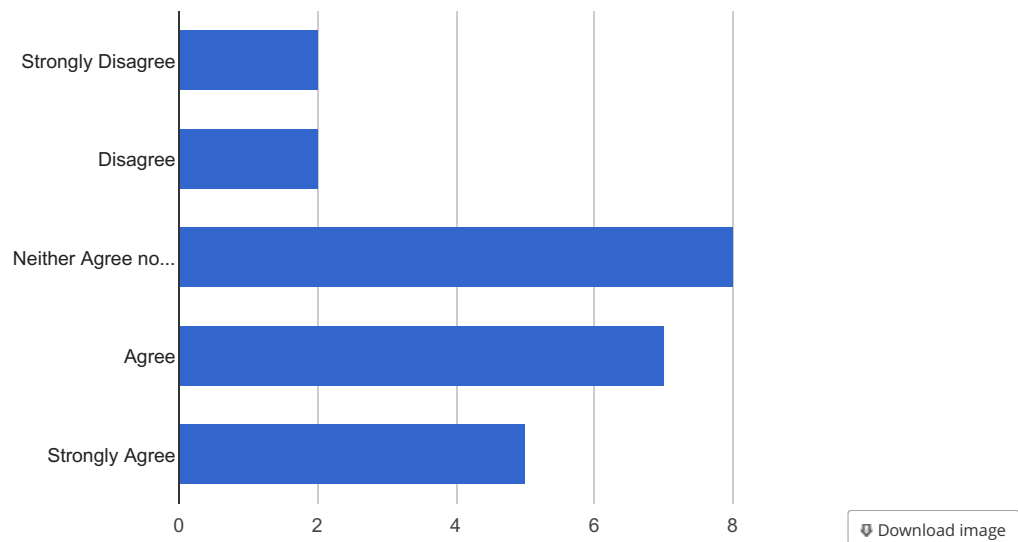

**20. ePNa helps me order appropriate antibiotics for OUTPATIENTS** (*outpatient\_abx*)

| Total Count (N) | Missing   | Unique |
|-----------------|-----------|--------|
| 24              | 7 (22.6%) | 5      |

**Counts/frequency:** Strongly Disagree (1, 4.2%), Disagree (2, 8.3%), Neither Agree nor Disagree (7, 29.2%), Agree (7, 29.2%), Strongly Agree (7, 29.2%)

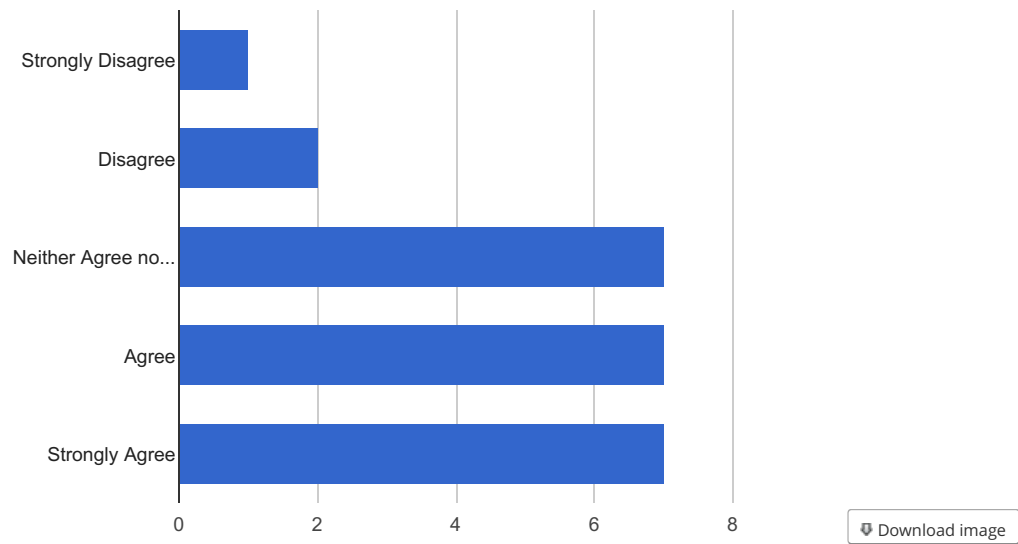

**21. ePNa helps me order appropriate antibiotics for INPATIENTS** (*inpatient\_abx*)

| Total Count (N) | Missing   | Unique |
|-----------------|-----------|--------|
| 24              | 7 (22.6%) | 4      |

**Counts/frequency:** Strongly Disagree (0, 0.0%), Disagree (2, 8.3%), Neither Agree nor Disagree (7, 29.2%), Agree (9, 37.5%), Strongly Agree (6, 25.0%)

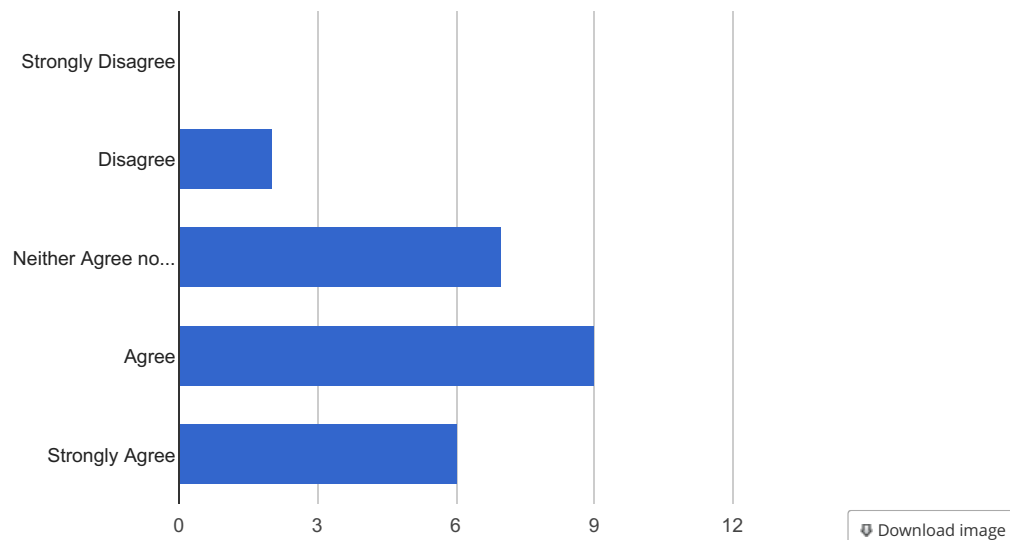

**22. ePNa is free of technical problems** (*technical\_difficulties*)

| Total Count (N) | Missing   | Unique |
|-----------------|-----------|--------|
| 24              | 7 (22.6%) | 4      |

**Counts/frequency:** Strongly Disagree (4, 16.7%), Disagree (8, 33.3%), Neither Agree nor Disagree (9, 37.5%), Agree (3, 12.5%), Strongly Agree (0, 0.0%)

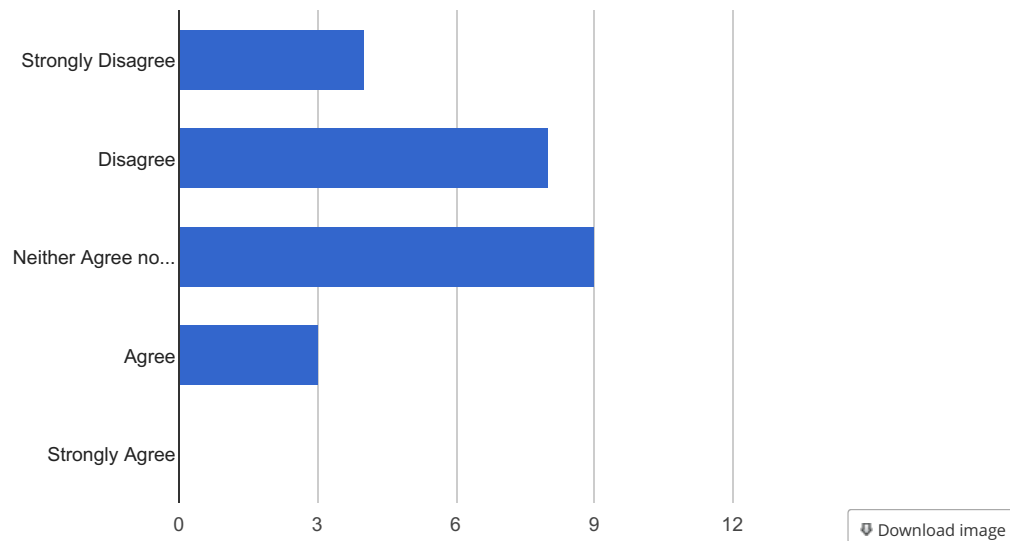

**23. ePNa helps with transfers of care** (*arrange\_hospitalists*)

| Total Count (N) | Missing   | Unique |
|-----------------|-----------|--------|
| 24              | 7 (22.6%) | 5      |

**Counts/frequency:** Strongly Disagree (5, 20.8%), Disagree (3, 12.5%), Neither Agree nor Disagree (9, 37.5%), Agree (6, 25.0%), Strongly Agree (1, 4.2%)

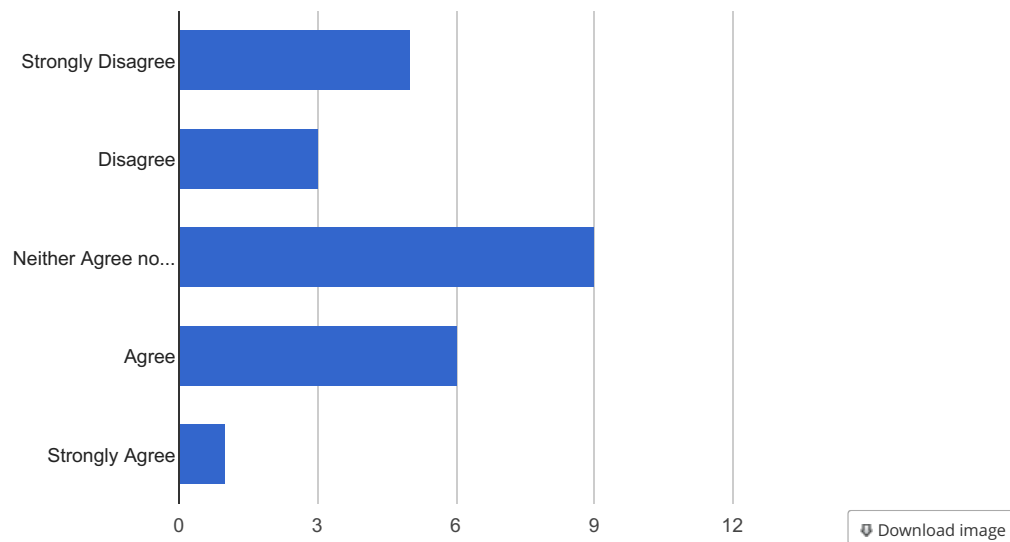

**24. ePNa ordersets make my workflow more efficient** *(efficient)*

| Total Count (N) | Missing   | Unique |
|-----------------|-----------|--------|
| 24              | 7 (22.6%) | 5      |

**Counts/frequency:** Strongly Disagree (3, 12.5%), Disagree (6, 25.0%), Neither Agree nor Disagree (10, 41.7%), Agree (2, 8.3%), Strongly Agree (3, 12.5%)

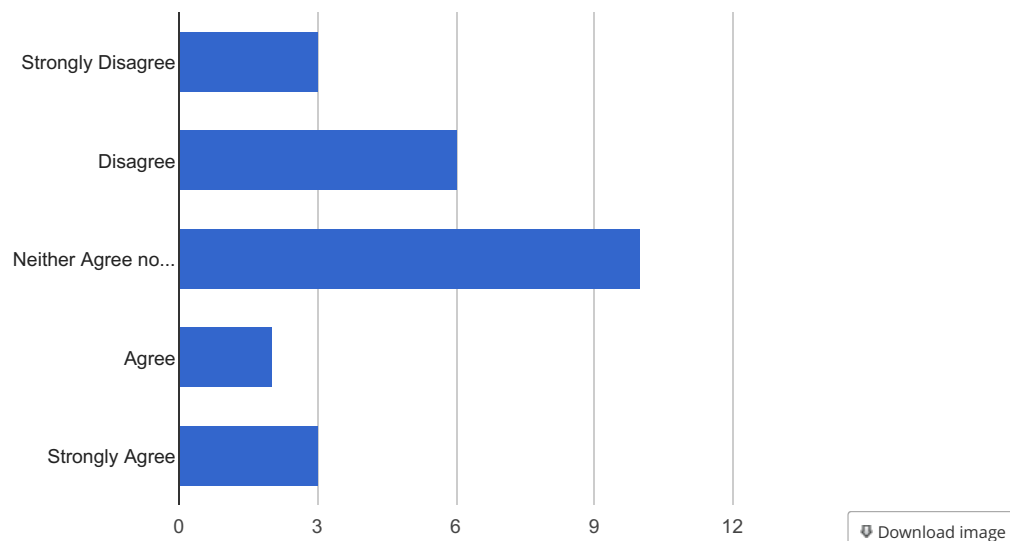

**25. I find myself disagreeing with ePNa recommendations** *(disagreeing)*

| Total Count (N) | Missing   | Unique |
|-----------------|-----------|--------|
| 24              | 7 (22.6%) | 4      |

**Counts/frequency:** Strongly Disagree (1, 4.2%), Disagree (11, 45.8%), Neither Agree nor Disagree (6, 25.0%), Agree (6, 25.0%), Strongly Agree (0, 0.0%)

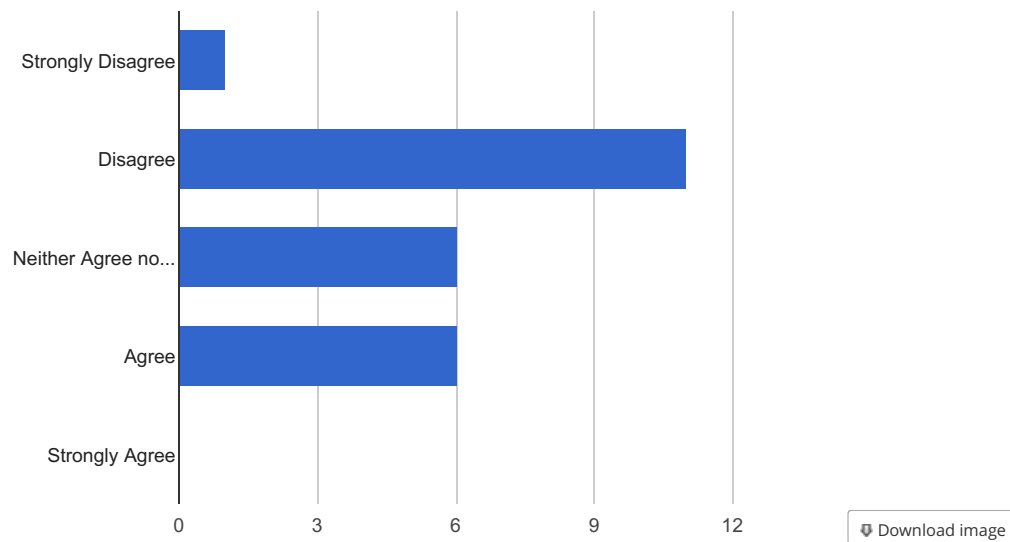

**26. ePNa doesn't follow treatment guidelines for pneumonia that I am familiar with**

*(tmt\_guidelines)*

| Total Count (N) | Missing   | Unique |
|-----------------|-----------|--------|
| 24              | 7 (22.6%) | 3      |

**Counts/frequency:** Strongly Disagree (7, 29.2%), Disagree (12, 50.0%), Neither Agree nor Disagree (5, 20.8%), Agree (0, 0.0%), Strongly Agree (0, 0.0%)

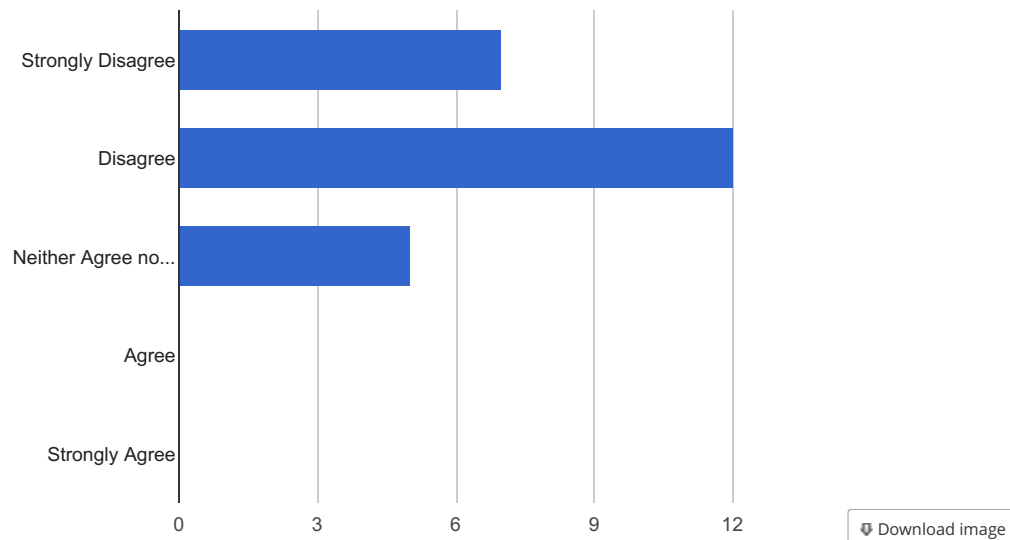

**27. ePNa helps me remember indicated testing for patients with pneumonia** *(remember)*

| Total Count (N) | Missing   | Unique |
|-----------------|-----------|--------|
| 24              | 7 (22.6%) | 5      |

**Counts/frequency:** Strongly Disagree (2, 8.3%), Disagree (3, 12.5%), Neither Agree nor Disagree (11, 45.8%), Agree (5, 20.8%), Strongly Agree (3, 12.5%)

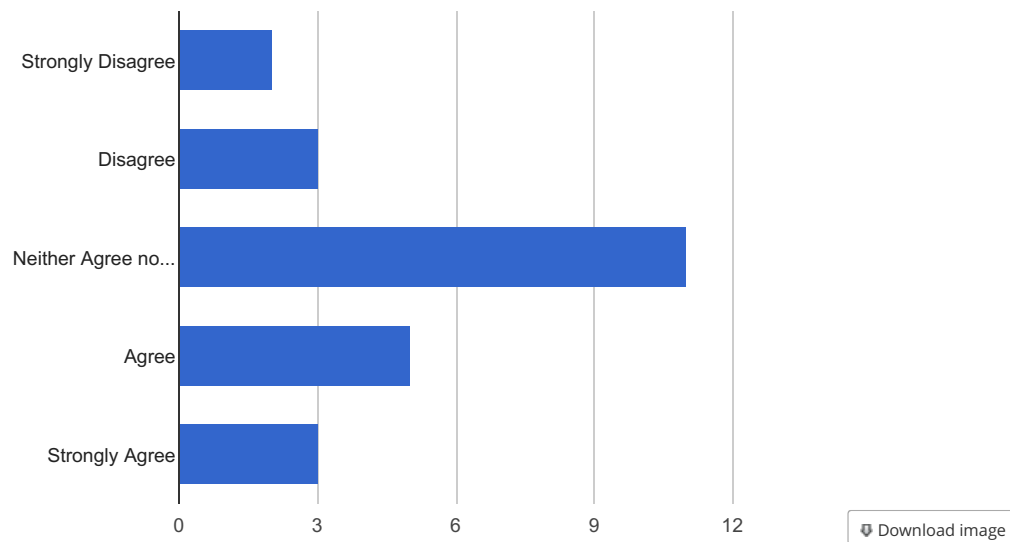

**28. I would follow ePNa recommendations more often if it gave me more information**

*(follow\_more\_often)*

| Total Count (N) | Missing   | Unique |
|-----------------|-----------|--------|
| 24              | 7 (22.6%) | 5      |

**Counts/frequency:** Strongly Disagree (3, 12.5%), Disagree (5, 20.8%), Neither Agree nor Disagree (13, 54.2%), Agree (2, 8.3%), Strongly Agree (1, 4.2%)

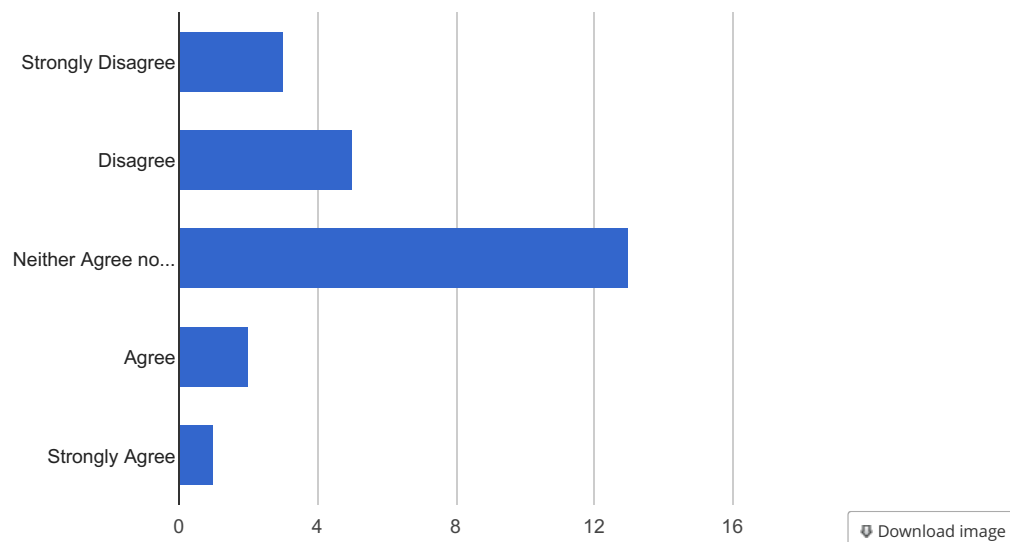

**29. What ideas do you have for improving the ePNa tool?** *(epna\_recommendation)*

| Total Count (N) | Missing    |
|-----------------|------------|
| 13              | 18 (58.1%) |

**30. What changes, features or information would help you use the ePNa tool on more of your patients with suspected pneumonia?** *(change\_comments)*

| Total Count (N) | Missing |
|-----------------|---------|
|                 |         |

|    |                            |
|----|----------------------------|
| 11 | <a href="#">20 (64.5%)</a> |
|----|----------------------------|

### 31. Thinking not just about pneumonia but about all your patients, do you think more clinical decision support tools would be helpful? *(more\_tools)*

| Total Count (N) | Missing                   | Unique |
|-----------------|---------------------------|--------|
| 24              | <a href="#">7 (22.6%)</a> | 2      |

Counts/frequency: **Yes** (16, 66.7%), **No** (8, 33.3%)

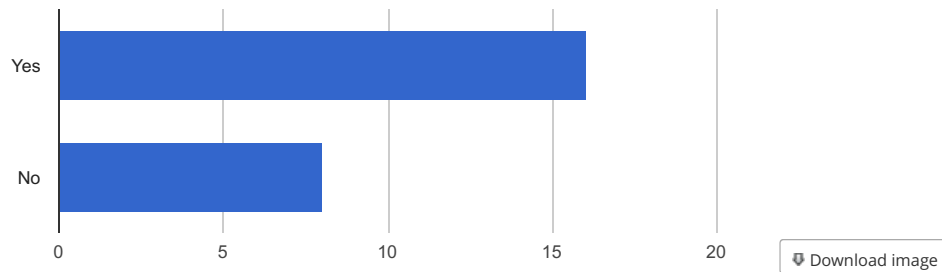

### 31B. Please explain what kind of clinical decision support tools you would be interested in. *(yes\_what)*

| Total Count (N) | Missing                    |
|-----------------|----------------------------|
| 14              | <a href="#">17 (54.8%)</a> |

### 31C. Please explain why you are not interested in more clinical decision support tools. *(no\_what)*

| Total Count (N) | Missing                    |
|-----------------|----------------------------|
| 7               | <a href="#">24 (77.4%)</a> |

### Complete? *(epna\_survey\_complete)*

| Total Count (N) | Missing  | Unique |
|-----------------|----------|--------|
| 31              | 0 (0.0%) | 1      |

Counts/frequency: **Incomplete** (0, 0.0%), **Unverified** (0, 0.0%), **Complete** (31, 100.0%)



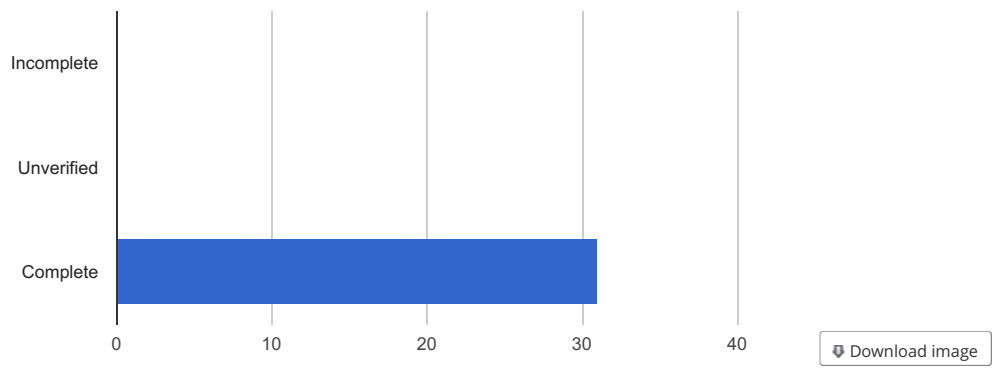

Supplement: NIHMS1647265-supplement-Supplementary_info_2.pdf [file NIHMS1647265-supplement-Supplementary_info_2.pdf]
