# Supplementary material
Source: PubMed Central journal article supplement (PMC8149487)
Supplement: NIHMS1647265-supplement-Supplementary_info_1.pdf [file NIHMS1647265-supplement-Supplementary_info_1.pdf]

# Pneumonia Decisions Support Tool (ePNa) Survey

Dear Clinician,

The purpose of this brief survey is to gain feedback and suggestions regarding the ePneumonia Clinical Decision Support Tool (ePNa). You were selected to participate because you work in an Emergency Department (ED) where we have deployed ePNa.

It should take less than 5 minutes to complete this survey. Your responses are important to us; they will be used to both improve ePNa functionality and help us more effectively roll it out to Emergency Departments. We are particularly interested in responses from smaller, rural hospital physicians where ePNa appears to need modification.

Your responses are confidential and your name will not be identified with your responses. Responses will be stored in REDCap, a secure, online repository sponsored by Intermountain Healthcare.

If you have any questions or concerns regarding this survey, please contact James Hart at 801-928-9727 or Nathan Dean at 801-891-7340.

Thank you.

---

Do you consent to participate in this survey on ePNa?

- Yes  
 No

## Clinician Information

---

1. What is your job position in the ED

- MD  
 PA  
 Nurse Practitioner  
 Other

---

1B. Where else do you work besides the ED?

\_\_\_\_\_

---

2. How many years have you worked in the ED?

\_\_\_\_\_

---

3. What is your age?

- 71+  
 61-70  
 51-60  
 41-50  
 31-40  
 20-30

---

4. What is your gender?

- Female  Male

---

5. In which ED do you work the majority of your shifts?

- Alta View
- American Fork
- Bear River
- Cassia
- Cedar City
- Delta
- Dixie Regional
- Fillmore
- Garfield
- Heber
- Intermountain Medical Center
- LDSH
- Logan
- McKay-Dee
- Orem Community
- Park City
- Riverton
- Sanpete
- Sevier Valley
- Utah Valley Regional
- Other

---

5B. Do you work in any other ED's?

---

---

6. Approximately how many patients have you managed with ePNa?

- More than 20
- 16-20
- 11-15
- 6-10
- 1-5
- 0

---

7. Rank your overall experience level with using ePNa

- Expert
- Veteran
- Intermediate
- Beginner

---

8. Which one of the following sources most often alerts you that a patient may have pneumonia?

- My own clinical judgement
- Launchpoint
- RN
- Scribe
- Resident
- Student
- HUC
- Other

---

8B. What is the 'other' most common way you are alerted that a patient may have pneumonia?

---

**Clinician Experience with the ePneumonia Decision Support Tool**

**Answer questions 8 to 17 by selecting the extent to which you agree or disagree with the following statements about the ePneumonia Decision Support Tool.**

|                                                                                          | Strongly Disagree     | Disagree              | Neither Agree nor Disagree | Agree                 | Strongly Agree        |
|------------------------------------------------------------------------------------------|-----------------------|-----------------------|----------------------------|-----------------------|-----------------------|
| 9. I notice the green P-alert in Launchpoint when one of my patients may have pneumonia. | <input type="radio"/> | <input type="radio"/> | <input type="radio"/>      | <input type="radio"/> | <input type="radio"/> |
| 10. The P-alert in Launchpoint reminds me to start the ePneumonia Decision Support Tool. | <input type="radio"/> | <input type="radio"/> | <input type="radio"/>      | <input type="radio"/> | <input type="radio"/> |
| 11. The Tool helps me be more confident when diagnosing pneumonia.                       | <input type="radio"/> | <input type="radio"/> | <input type="radio"/>      | <input type="radio"/> | <input type="radio"/> |
| 12. It takes too much time to use the Tool.                                              | <input type="radio"/> | <input type="radio"/> | <input type="radio"/>      | <input type="radio"/> | <input type="radio"/> |
| 13. The Tool helps me determine when outpatient care is appropriate.                     | <input type="radio"/> | <input type="radio"/> | <input type="radio"/>      | <input type="radio"/> | <input type="radio"/> |
| 14. The Tool helps me provide best care for my patients with pneumonia.                  | <input type="radio"/> | <input type="radio"/> | <input type="radio"/>      | <input type="radio"/> | <input type="radio"/> |
| 15. The Tool helps me prescribe appropriate antibiotics for OUTPATIENTS.                 | <input type="radio"/> | <input type="radio"/> | <input type="radio"/>      | <input type="radio"/> | <input type="radio"/> |
| 16. The Tool helps me initiate appropriate antibiotics for INPATIENTS.                   | <input type="radio"/> | <input type="radio"/> | <input type="radio"/>      | <input type="radio"/> | <input type="radio"/> |
| 17. The Tool is free of technical problems.                                              | <input type="radio"/> | <input type="radio"/> | <input type="radio"/>      | <input type="radio"/> | <input type="radio"/> |
| 18. The Tools helps me arrange inpatient care with hospitalists or critical care.        | <input type="radio"/> | <input type="radio"/> | <input type="radio"/>      | <input type="radio"/> | <input type="radio"/> |

19. If you have comments or suggestions on improving the Tool, please enter them in the space provided.

This marks the end of the survey. If you are satisfied with your responses, please click "Submit."
